# Supplementary material
Source: PubMed Central journal article supplement (PMC4002318)
Supplement: aps2010147x1.pdf [file aps2010147x1.pdf]

## Supplementary Table - Matrices with conserved regulatory sequences in promoter regions of human, or murine, NRF2 and AP-1

| Family/Matrix                                                                                                              | Sequence Name | Optimized Threshold | Start Position | End Position | Strand | Matrix Similarity | Core Similarity | Sequence (Core Sequence in Upper Case) |
|----------------------------------------------------------------------------------------------------------------------------|---------------|---------------------|----------------|--------------|--------|-------------------|-----------------|----------------------------------------|
| <b>Activator protein 1, AP-1</b>                                                                                           |               |                     |                |              |        |                   |                 |                                        |
| V\$AP1F/V\$AP1.02                                                                                                          | Nrf2-mouse    | 0.87                | 237            | 247          | -      | 0.88              | 1               | gcgGAGTcagg                            |
| <b>Nuclear factor (erythroid-derived 2)-like 2, NRF2</b>                                                                   |               |                     |                |              |        |                   |                 |                                        |
| V\$AP1R/V\$NFE2L2.01                                                                                                       | Ap1-human     | 0.7                 | 265            | 289          | +      | 0.718             | 0.826           | accagacaATGAatcagctcccttg              |
| <b>Activator protein 4</b>                                                                                                 |               |                     |                |              |        |                   |                 |                                        |
| V\$AP4R/V\$AP4.01                                                                                                          | Ap1-human     | 0.85                | 236            | 252          | -      | 0.887             | 1               | gggccCAGCtggcggcc                      |
| V\$AP4R/V\$AP4.01                                                                                                          | Ap1-human     | 0.85                | 554            | 570          | -      | 0.926             | 1               | agaacCAGCtctcggcc                      |
| V\$AP4R/V\$AP4.01                                                                                                          | Nrf2-human    | 0.85                | 279            | 295          | -      | 0.942             | 1               | actgcCAGCtggggtcc                      |
| <b>Activator protein 4</b>                                                                                                 |               |                     |                |              |        |                   |                 |                                        |
| V\$AP4R/V\$AP4.02                                                                                                          | Nrf2-mouse    | 0.92                | 133            | 149          | -      | 0.925             | 1               | attagcAGCTgtttgcc                      |
| V\$AP4R/V\$AP4.02                                                                                                          | Ap1-mouse     | 0.92                | 183            | 199          | -      | 0.944             | 1               | ctttacAGCTgtttccc                      |
| V\$AP4R/V\$AP4.02                                                                                                          | Nrf2-mouse    | 0.92                | 134            | 150          | +      | 0.943             | 1               | gcaaacAGCTgctaadc                      |
| V\$AP4R/V\$AP4.02                                                                                                          | Ap1-mouse     | 0.92                | 469            | 485          | +      | 0.975             | 1               | gctgacAGCTgctggcg                      |
| <b>BTB/POZ-bZIP transcription factor BACH1, forms heterodimers with the small Maf protein family</b>                       |               |                     |                |              |        |                   |                 |                                        |
| V\$AP1R/V\$BACH1.01                                                                                                        | Ap1-human     | 0.82                | 40             | 64           | -      | 0.856             | 1               | cagcactgaTGAGtgatcagctctc              |
| <b>Bach2 bound TRE</b>                                                                                                     |               |                     |                |              |        |                   |                 |                                        |
| V\$AP1R/V\$BACH2.01                                                                                                        | Nrf2-human    | 0.89                | 316            | 340          | +      | 0.918             | 0.868           | cgagctctTGCGtcagccccggcg               |
| <b>Paraxis (TCF15), member of the Twist subfamily of Class B bHLH factors, forms heterodimers with E12</b>                 |               |                     |                |              |        |                   |                 |                                        |
| V\$AP4R/V\$PARAXIS.01                                                                                                      | Ap1-mouse     | 0.86                | 55             | 71           | +      | 0.904             | 0.882           | ccgACCAcatgagtagg                      |
| V\$AP4R/V\$PARAXIS.01                                                                                                      | Nrf2-mouse    | 0.86                | 770            | 786          | -      | 0.891             | 0.882           | ggcAGCAcctgctggga                      |
| V\$AP4R/V\$PARAXIS.01                                                                                                      | Ap1-mouse     | 0.86                | 18             | 34           | -      | 0.888             | 0.882           | gtgAGCAcatgctgaac                      |
| <b>Cell cycle-dependent element, CDF-1 binding site (CDE/CHR tandem elements regulate cell cycle dependent repression)</b> |               |                     |                |              |        |                   |                 |                                        |
| V\$CDEF/V\$CDE.01                                                                                                          | Ap1-human     | 0.87                | 185            | 197          | -      | 0.898             | 1               | tgatCGCGgttag                          |
| V\$CDEF/V\$CDE.01                                                                                                          | Nrf2-human    | 0.87                | 364            | 376          | -      | 0.92              | 1               | gccgCGCGggctg                          |
| V\$CDEF/V\$CDE.01                                                                                                          | Nrf2-human    | 0.87                | 540            | 552          | -      | 0.875             | 1               | gcggCGCGgacag                          |
| <b>Cell cycle gene homology region (CDE/CHR tandem elements regulate cell cycle dependent repression)</b>                  |               |                     |                |              |        |                   |                 |                                        |
| V\$CHRF/V\$CHR.01                                                                                                          | Ap1-human     | 0.92                | 199            | 211          | -      | 0.943             | 1               | ccgtTTGAaacc                           |
| V\$CHRF/V\$CHR.01                                                                                                          | Nrf2-human    | 0.92                | 131            | 143          | -      | 0.929             | 1               | cgctTTGAaacag                          |
| <b>CP2</b>                                                                                                                 |               |                     |                |              |        |                   |                 |                                        |
| V\$CP2F/V\$CP2.01                                                                                                          | Nrf2-mouse    | 0.9                 | 800            | 818          | +      | 0.9               | 1               | ccCTGGgctgtgccaagaa                    |
| V\$CP2F/V\$CP2.01                                                                                                          | Ap1-mouse     | 0.9                 | 518            | 536          | -      | 0.912             | 1               | cgCTGGctccggctccgg                     |
| V\$CP2F/V\$CP2.01                                                                                                          | Ap1-mouse     | 0.9                 | 427            | 445          | +      | 0.949             | 0.909           | gaCTTGgtggggcggtg                      |
| <b>E2F, involved in cell cycle regulation, interacts with Rb p107 protein</b>                                              |               |                     |                |              |        |                   |                 |                                        |
| V\$E2FF/V\$E2F.03                                                                                                          | Ap1-human     | 0.85                | 368            | 384          | -      | 0.874             | 1               | gctgtGCGCgcccacgg                      |
| V\$E2FF/V\$E2F.03                                                                                                          | Ap1-human     | 0.85                | 369            | 385          | +      | 0.928             | 1               | cgctggGCGCgcccacgg                     |
| V\$E2FF/V\$E2F.03                                                                                                          | Nrf2-human    | 0.85                | 538            | 554          | -      | 0.898             | 1               | gcgGCGCggacaggg                        |
| <b>GLI-Krüppel-related transcription factor, regulator of adenovirus E4 promoter</b>                                       |               |                     |                |              |        |                   |                 |                                        |
| V\$E4FF/V\$E4F.01                                                                                                          | Ap1-mouse     | 0.82                | 384            | 396          | +      | 0.887             | 0.789           | atgAAGTcacgtg                          |
| V\$E4FF/V\$E4F.01                                                                                                          | Nrf2-mouse    | 0.82                | 220            | 232          | -      | 0.831             | 0.789           | ctgAAGTgcacg                           |
| <b>MYC-MAX binding sites</b>                                                                                               |               |                     |                |              |        |                   |                 |                                        |
| V\$EBOX/V\$MYCMAx.03                                                                                                       | Ap1-human     | 0.91                | 411            | 423          | -      | 0.925             | 1               | gggcctCGCGccc                          |
| V\$EBOX/V\$MYCMAx.03                                                                                                       | Nrf2-human    | 0.91                | 366            | 378          | -      | 0.925             | 1               | cgccgCGCGggc                           |

| Family/Matrix                                     | Sequence Name | Optimized Threshold | Start Position | End Position | Strand | Matrix Similarity | Core Similarity | Sequence (Core Sequence in Upper Case) |
|---------------------------------------------------|---------------|---------------------|----------------|--------------|--------|-------------------|-----------------|----------------------------------------|
| <b>EGR1, early growth response 1 - in human</b>   |               |                     |                |              |        |                   |                 |                                        |
| V\$EGRF/V\$EGR1.02                                | Ap1-human     | 0.86                | 302            | 318          | -      | 0.894             | 1               | ggctggtgGGGCggtcg                      |
| V\$EGRF/V\$EGR1.02                                | Ap1-human     | 0.86                | 420            | 436          | -      | 0.879             | 1               | ggcgcatgGGGCggggc                      |
| V\$EGRF/V\$EGR1.02                                | Ap1-human     | 0.86                | 506            | 522          | +      | 0.866             | 0.789           | ggtggcggCGGCgaagg                      |
| V\$EGRF/V\$EGR1.02                                | Ap1-human     | 0.86                | 568            | 584          | +      | 0.862             | 0.789           | tctggtggCGGCggggc                      |
| V\$EGRF/V\$EGR1.02                                | Nrf2-human    | 0.86                | 299            | 315          | -      | 0.904             | 1               | cggtccggGGCgggaa                       |
| V\$EGRF/V\$EGR1.02                                | Nrf2-human    | 0.86                | 412            | 428          | +      | 0.875             | 1               | cccttgGCGGCgggag                       |
| V\$EGRF/V\$EGR1.02                                | Nrf2-human    | 0.86                | 502            | 518          | -      | 0.906             | 0.789           | ggcggcggTGGCggctg                      |
| V\$EGRF/V\$EGR1.02                                | Nrf2-human    | 0.86                | 508            | 524          | -      | 0.914             | 0.789           | ggcggcggCGGCggtgg                      |
| V\$EGRF/V\$EGR1.02                                | Nrf2-human    | 0.86                | 511            | 527          | -      | 0.911             | 0.789           | ggcggcggCGGCggcgg                      |
| V\$EGRF/V\$EGR1.02                                | Nrf2-human    | 0.86                | 514            | 530          | -      | 0.872             | 0.789           | ggtggcggCGGCggcgg                      |
| V\$EGRF/V\$EGR1.02                                | Nrf2-human    | 0.86                | 694            | 710          | +      | 0.915             | 1               | cgggacggGGGCggggg                      |
| <b>EGR1, early growth response 1 - in mouse</b>   |               |                     |                |              |        |                   |                 |                                        |
| V\$EGRF/V\$EGR1.02                                | Ap1-mouse     | 0.86                | 428            | 444          | +      | 0.863             | 1               | acttggtGCGCggtgt                       |
| V\$EGRF/V\$EGR1.02                                | Nrf2-mouse    | 0.86                | 663            | 679          | -      | 0.865             | 0.789           | agtgtaggCGGCggcaa                      |
| V\$EGRF/V\$EGR1.02                                | Nrf2-mouse    | 0.86                | 572            | 588          | +      | 0.905             | 1               | ccccaggGCGCggggg                       |
| V\$EGRF/V\$EGR1.02                                | Nrf2-mouse    | 0.86                | 566            | 582          | -      | 0.903             | 1               | ccccctggGGCggaac                       |
| V\$EGRF/V\$EGR1.02                                | Ap1-mouse     | 0.86                | 405            | 421          | -      | 0.874             | 1               | cgacgacGCGCggggc                       |
| V\$EGRF/V\$EGR1.02                                | Nrf2-mouse    | 0.86                | 209            | 225          | -      | 0.902             | 1               | cgacgggGGCgggagc                       |
| V\$EGRF/V\$EGR1.02                                | Ap1-mouse     | 0.86                | 538            | 554          | +      | 0.978             | 1               | cgcgggGGGCgggcg                        |
| V\$EGRF/V\$EGR1.02                                | Nrf2-mouse    | 0.86                | 583            | 599          | +      | 0.896             | 1               | cgggggcGCGCggact                       |
| V\$EGRF/V\$EGR1.02                                | Nrf2-mouse    | 0.86                | 179            | 195          | +      | 0.893             | 1               | gactggggGGCcggaag                      |
| V\$EGRF/V\$EGR1.02                                | Ap1-mouse     | 0.86                | 584            | 600          | +      | 0.891             | 1               | ggcggggGCGCggagt                       |
| V\$EGRF/V\$EGR1.02                                | Nrf2-mouse    | 0.86                | 460            | 476          | -      | 0.875             | 1               | gggtaagGGCggggc                        |
| <b>Wilms Tumor Suppressor</b>                     |               |                     |                |              |        |                   |                 |                                        |
| V\$EGRF/V\$WT1.01                                 | Nrf2-mouse    | 0.92                | 372            | 388          | -      | 0.945             | 0.837           | aggggAGGGggggacaa                      |
| V\$EGRF/V\$WT1.01                                 | Ap1-mouse     | 0.92                | 544            | 560          | +      | 0.928             | 0.953           | gggggCGGCgcggggc                       |
| V\$EGRF/V\$WT1.01                                 | Nrf2-mouse    | 0.92                | 578            | 594          | +      | 0.98              | 0.953           | gggggCGGggcgggc                        |
| <b>Kidney-enriched kruppel-like factor, KLF15</b> |               |                     |                |              |        |                   |                 |                                        |
| V\$EKLF/V\$KKLF.01                                | Nrf2-mouse    | 0.91                | 372            | 388          | -      | 0.949             | 1               | aggggaGGGggggacaa                      |
| V\$EKLF/V\$KKLF.01                                | Ap1-mouse     | 0.91                | 429            | 445          | +      | 0.931             | 1               | cttggtGGGcgggtgc                       |
| V\$EKLF/V\$KKLF.01                                | Nrf2-mouse    | 0.91                | 579            | 595          | +      | 0.94              | 1               | ggggcgGGGcgggggcg                      |
| V\$EKLF/V\$KKLF.01                                | Nrf2-mouse    | 0.91                | 584            | 600          | +      | 0.948             | 1               | gggggcGGGcggacta                       |
| V\$EKLF/V\$KKLF.01                                | Ap1-mouse     | 0.91                | 581            | 597          | +      | 0.921             | 1               | gtcggcGGGcgggcgg                       |
| <b>Elk-1 - in human</b>                           |               |                     |                |              |        |                   |                 |                                        |
| V\$SETSF/V\$ELK1.02                               | Nrf2-human    | 0.91                | 84             | 104          | -      | 0.958             | 1               | ggagccccGGAAggcttgg                    |
| V\$SETSF/V\$ELK1.02                               | Nrf2-human    | 0.91                | 557            | 577          | +      | 0.951             | 1               | cgccagccGGAAcaggccgc                   |
| <b>Elk-1 - in mouse</b>                           |               |                     |                |              |        |                   |                 |                                        |
| V\$SETSF/V\$ELK1.02                               | Nrf2-mouse    | 0.91                | 305            | 325          | +      | 0.987             | 1               | ctccggccGGAAgcactcagg                  |
| V\$SETSF/V\$ELK1.02                               | Ap1-mouse     | 0.91                | 444            | 464          | +      | 0.977             | 1               | tctgccccGGAAGtgcctgc                   |

| Family/Matrix                                                                                              | Sequence Name | Optimized Threshold | Start Position | End Position | Strand | Matrix Similarity | Core Similarity | Sequence (Core Sequence in Upper Case) |
|------------------------------------------------------------------------------------------------------------|---------------|---------------------|----------------|--------------|--------|-------------------|-----------------|----------------------------------------|
| <b>MEL1 (MDS1/EVI1-like gene 1) DNA-binding domain 2</b>                                                   |               |                     |                |              |        |                   |                 |                                        |
| V\$EVI1/V\$MEL1.02                                                                                         | Ap1-human     | 0.99                | 48             | 64           | -      | 1                 | 1               | cagcactGATGagtgat                      |
| V\$EVI1/V\$MEL1.02                                                                                         | Nrf2-human    | 0.99                | 604            | 620          | -      | 0.995             | 1               | ccatcatGATGagctgt                      |
| <b>Fork head related activator-4 (FOXD1)</b>                                                               |               |                     |                |              |        |                   |                 |                                        |
| V\$FKHD/V\$FREAC4.01                                                                                       | Ap1-mouse     | 0.78                | 179            | 195          | +      | 0.811             | 1               | ccaagggAACAgctgt                       |
| V\$FKHD/V\$FREAC4.01                                                                                       | Nrf2-mouse    | 0.78                | 129            | 145          | +      | 0.784             | 1               | cttcggcaAACAgctgc                      |
| <b>GATA-binding factor 1</b>                                                                               |               |                     |                |              |        |                   |                 |                                        |
| V\$GATA/V\$GATA1.03                                                                                        | Ap1-human     | 0.95                | 88             | 100          | -      | 0.972             | 1               | aacaGATAggtcc                          |
| V\$GATA/V\$GATA1.03                                                                                        | Nrf2-human    | 0.95                | 172            | 184          | -      | 0.963             | 1               | gcgaGATAaagag                          |
| <b>Zinc finger transcription factor, Zic family member 2 (odd-paired homolog, Drosophila)</b>              |               |                     |                |              |        |                   |                 |                                        |
| V\$GLIF/V\$ZIC2.01                                                                                         | Ap1-mouse     | 0.89                | 431            | 445          | -      | 0.938             | 1               | gacaccgCCCCacca                        |
| V\$GLIF/V\$ZIC2.01                                                                                         | Nrf2-mouse    | 0.89                | 156            | 170          | -      | 0.914             | 1               | gacagcaCCCCcttg                        |
| <b>Glucocorticoid receptor, C2C2 zinc finger protein binds glucocorticoid dependent to GREs, IR3 sites</b> |               |                     |                |              |        |                   |                 |                                        |
| V\$GREF/V\$GRE.01                                                                                          | Nrf2-mouse    | 0.85                | 66             | 84           | +      | 0.886             | 0.833           | ggggctcccgtGTGCttg                     |
| V\$GREF/V\$GRE.01                                                                                          | Ap1-mouse     | 0.85                | 15             | 33           | +      | 0.898             | 0.833           | taggtcagcatGTGCtca                     |
| <b>Heterodimers of the bHLH transcription factors HAND2 (Thing2) and E12</b>                               |               |                     |                |              |        |                   |                 |                                        |
| V\$HAND/V\$HAND2_E12.01                                                                                    | Ap1-human     | 0.75                | 234            | 248          | +      | 0.779             | 1               | tgggccGCCAgctgg                        |
| V\$HAND/V\$HAND2_E12.01                                                                                    | Ap1-human     | 0.75                | 241            | 255          | -      | 0.806             | 0.759           | gcagggCCCgctgg                         |
| V\$HAND/V\$HAND2_E12.01                                                                                    | Ap1-human     | 0.75                | 540            | 554          | -      | 0.773             | 1               | cgcagcGCCAtcttg                        |
| V\$HAND/V\$HAND2_E12.01                                                                                    | Nrf2-human    | 0.75                | 284            | 298          | -      | 0.755             | 1               | gggactGCCAgctgg                        |
| <b>Hey-like bHLH-transcriptional repressor</b>                                                             |               |                     |                |              |        |                   |                 |                                        |
| V\$HESF/V\$HELT.01                                                                                         | Nrf2-mouse    | 0.91                | 54             | 68           | +      | 0.949             | 1               | agcgCACGggccggg                        |
| V\$HESF/V\$HELT.01                                                                                         | Ap1-mouse     | 0.91                | 363            | 377          | -      | 0.949             | 1               | cgggCACGagcggcg                        |
| V\$HESF/V\$HELT.01                                                                                         | Nrf2-mouse    | 0.91                | 213            | 227          | -      | 0.917             | 1               | gtcgCACGggggggcg                       |
| <b>Hypoxia inducible factor, bHLH / PAS protein family</b>                                                 |               |                     |                |              |        |                   |                 |                                        |
| V\$HIF/V\$HIF1.02                                                                                          | Nrf2-mouse    | 0.93                | 213            | 225          | +      | 0.934             | 1               | cgccccCGTGcg                           |
| V\$HIF/V\$HIF1.02                                                                                          | Ap1-mouse     | 0.93                | 389            | 401          | -      | 0.964             | 1               | gcgccccCGTGac                          |
| <b>Liver enriched Cut - Homeodomain transcription factor HNF6 (ONECUT)</b>                                 |               |                     |                |              |        |                   |                 |                                        |
| V\$HNF6/V\$HNF6.01                                                                                         | Nrf2-mouse    | 0.82                | 733            | 749          | -      | 0.873             | 0.833           | actccaagTCCAatcatg                     |
| V\$HNF6/V\$HNF6.01                                                                                         | Ap1-mouse     | 0.82                | 119            | 135          | -      | 0.935             | 1               | tacttaagTCAAtctag                      |
| <b>Zinc finger protein insulinoma-associated 1 (IA-1) functions as a transcriptional repressor</b>         |               |                     |                |              |        |                   |                 |                                        |
| V\$INSM/V\$INSM1.01                                                                                        | Ap1-mouse     | 0.9                 | 372            | 384          | +      | 0.952             | 1               | tgcccGGGGgcca                          |
| V\$INSM/V\$INSM1.01                                                                                        | Ap1-mouse     | 0.9                 | 491            | 503          | -      | 0.915             | 1               | tgctcGGGGccgc                          |
| V\$INSM/V\$INSM1.01                                                                                        | Nrf2-mouse    | 0.9                 | 248            | 260          | -      | 0.934             | 1               | tgtccGGGGcatg                          |
| <b>MYC-associated zinc finger protein related transcription factor - in human</b>                          |               |                     |                |              |        |                   |                 |                                        |
| V\$MAZF/V\$MAZR.01                                                                                         | Ap1-human     | 0.88                | 418            | 430          | -      | 0.929             | 1               | tggggcGGGGcct                          |
| V\$MAZF/V\$MAZR.01                                                                                         | Ap1-human     | 0.88                | 446            | 458          | +      | 0.895             | 1               | cgaggtGGGGcct                          |
| V\$MAZF/V\$MAZR.01                                                                                         | Ap1-human     | 0.88                | 574            | 586          | +      | 0.889             | 1               | ggcggcGGGGccg                          |
| V\$MAZF/V\$MAZR.01                                                                                         | Nrf2-human    | 0.88                | 340            | 352          | +      | 0.889             | 1               | gcgggtGGGGgat                          |
| V\$MAZF/V\$MAZR.01                                                                                         | Nrf2-human    | 0.88                | 404            | 416          | -      | 0.905             | 1               | aagggcGGGGcaa                          |
| V\$MAZF/V\$MAZR.01                                                                                         | Nrf2-human    | 0.88                | 700            | 712          | +      | 0.893             | 1               | gggggcGGGGgag                          |

| Family/Matrix                                                                                            | Sequence Name | Optimized Threshold | Start Position | End Position | Strand | Matrix Similarity | Core Similarity | Sequence (Core Sequence in Upper Case) |
|----------------------------------------------------------------------------------------------------------|---------------|---------------------|----------------|--------------|--------|-------------------|-----------------|----------------------------------------|
| <b>MYC-associated zinc finger protein related transcription factor - in mouse</b>                        |               |                     |                |              |        |                   |                 |                                        |
| V\$MAZF/V\$MAZR.01                                                                                       | Nrf2-mouse    | 0.88                | 180            | 192          | +      | 0.93              | 1               | actgggGGGGccg                          |
| V\$MAZF/V\$MAZR.01                                                                                       | Nrf2-mouse    | 0.88                | 458            | 470          | -      | 0.929             | 1               | aggggcGGGGcaa                          |
| V\$MAZF/V\$MAZR.01                                                                                       | Ap1-mouse     | 0.88                | 403            | 415          | -      | 0.913             | 1               | cggggcGGGGctg                          |
| V\$MAZF/V\$MAZR.01                                                                                       | Nrf2-mouse    | 0.88                | 329            | 341          | -      | 0.896             | 1               | gagggcGGGGcat                          |
| V\$MAZF/V\$MAZR.01                                                                                       | Nrf2-mouse    | 0.88                | 373            | 385          | -      | 0.95              | 1               | ggagggGGGGaca                          |
| V\$MAZF/V\$MAZR.01                                                                                       | Nrf2-mouse    | 0.88                | 584            | 596          | +      | 0.917             | 1               | gggggcGGGGcgg                          |
| V\$MAZF/V\$MAZR.01                                                                                       | Nrf2-mouse    | 0.88                | 578            | 590          | +      | 0.904             | 1               | gggggcGGGGgcg                          |
| V\$MAZF/V\$MAZR.01                                                                                       | Nrf2-mouse    | 0.88                | 388            | 400          | -      | 0.904             | 1               | tagggcGGGGcaa                          |
| <b>Ribonucleoprotein associated zinc finger protein MOK-2 (human)</b>                                    |               |                     |                |              |        |                   |                 |                                        |
| V\$MOKF/V\$MOK2.02                                                                                       | Ap1-mouse     | 0.98                | 62             | 82           | +      | 0.983             | 1               | catgagtagggcaCCTTggag                  |
| V\$MOKF/V\$MOK2.02                                                                                       | Nrf2-mouse    | 0.98                | 549            | 569          | +      | 0.981             | 1               | cccgtccctaggtCCTTgttc                  |
| V\$MOKF/V\$MOK2.02                                                                                       | Ap1-mouse     | 0.98                | 133            | 153          | -      | 0.984             | 1               | gacactgacagtaCCTTtac                   |
| V\$MOKF/V\$MOK2.02                                                                                       | Ap1-mouse     | 0.98                | 193            | 213          | -      | 1                 | 1               | ggatctagagggCCTTtaca                   |
| V\$MOKF/V\$MOK2.02                                                                                       | Nrf2-mouse    | 0.98                | 412            | 432          | +      | 0.981             | 1               | ggggccctcgggtCCTTgccc                  |
| V\$MOKF/V\$MOK2.02                                                                                       | Nrf2-mouse    | 0.98                | 7              | 27           | -      | 0.983             | 1               | tggacctgcagaaCCTTgccc                  |
| <b>c-Myb, important in hematopoiesis, cellular equivalent to avian myoblastosis virus oncogene v-myb</b> |               |                     |                |              |        |                   |                 |                                        |
| V\$MYBL/V\$CMYB.02                                                                                       | Ap1-human     | 0.96                | 184            | 196          | +      | 0.971             | 1               | acTAAcCcgcatc                          |
| V\$MYBL/V\$CMYB.02                                                                                       | Nrf2-human    | 0.96                | 117            | 129          | +      | 0.961             | 0.99            | tcCAACtgttaa                           |
| <b>v-Myb</b>                                                                                             |               |                     |                |              |        |                   |                 |                                        |
| V\$MYBL/V\$VMYB.02                                                                                       | Ap1-human     | 0.9                 | 215            | 227          | +      | 0.978             | 1               | accAACGgcgctt                          |
| V\$MYBL/V\$VMYB.02                                                                                       | Nrf2-human    | 0.9                 | 243            | 255          | +      | 0.991             | 1               | gctAACGgagacc                          |
| <b>Myf5 myogenic bHLH protein - in human</b>                                                             |               |                     |                |              |        |                   |                 |                                        |
| V\$MYOD/V\$MYF5.01                                                                                       | Ap1-human     | 0.9                 | 488            | 504          | +      | 0.932             | 1               | gctgaCAGCtgctgata                      |
| V\$MYOD/V\$MYF5.01                                                                                       | Ap1-human     | 0.9                 | 490            | 506          | -      | 0.905             | 1               | cttatCAGCagctgtca                      |
| V\$MYOD/V\$MYF5.01                                                                                       | Ap1-human     | 0.9                 | 518            | 534          | +      | 0.91              | 1               | gaaggCAGCggcaggtc                      |
| V\$MYOD/V\$MYF5.01                                                                                       | Nrf2-human    | 0.9                 | 650            | 666          | -      | 0.953             | 0.836           | ggcagCACctgctggga                      |
| <b>Myf5 myogenic bHLH protein - in mouse</b>                                                             |               |                     |                |              |        |                   |                 |                                        |
| V\$MYOD/V\$MYF5.01                                                                                       | Ap1-mouse     | 0.9                 | 471            | 487          | -      | 0.936             | 1               | cgcgCAGCagctgtca                       |
| V\$MYOD/V\$MYF5.01                                                                                       | Ap1-mouse     | 0.9                 | 469            | 485          | +      | 0.932             | 1               | gctgaCAGCtgctggcg                      |
| V\$MYOD/V\$MYF5.01                                                                                       | Nrf2-mouse    | 0.9                 | 770            | 786          | -      | 0.953             | 0.836           | ggcagCACctgctggga                      |
| <b>Complex of Lmo2 bound to Tal-1, E2A proteins, and GATA-1, half-site 1</b>                             |               |                     |                |              |        |                   |                 |                                        |
| V\$MYOD/V\$TAL1_E2A.01                                                                                   | Nrf2-mouse    | 0.98                | 771            | 787          | +      | 0.99              | 1               | cccagCAGGtgctgccc                      |
| V\$MYOD/V\$TAL1_E2A.01                                                                                   | Ap1-mouse     | 0.98                | 237            | 253          | -      | 0.98              | 1               | gaacaCAGGtgctttc                       |
| <b>Neurogenin 1 and 3 (ngn1/3) binding sites</b>                                                         |               |                     |                |              |        |                   |                 |                                        |
| V\$NEUR/V\$NEUROG.01                                                                                     | Ap1-human     | 0.92                | 239            | 251          | -      | 0.94              | 0.875           | ggcCCAGctggcg                          |
| V\$NEUR/V\$NEUROG.01                                                                                     | Nrf2-human    | 0.92                | 281            | 293          | +      | 0.935             | 0.875           | accCCAGctggca                          |
| <b>NF-kappaB (p50)</b>                                                                                   |               |                     |                |              |        |                   |                 |                                        |
| V\$NFKB/V\$NFKAPPAB50.01                                                                                 | Ap1-human     | 0.83                | 397            | 409          | +      | 0.832             | 1               | cggGGGAgctcacg                         |
| V\$NFKB/V\$NFKAPPAB50.01                                                                                 | Nrf2-human    | 0.83                | 580            | 592          | +      | 0.944             | 1               | tcgGGGAgcccca                          |
| V\$NFKB/V\$NFKAPPAB50.01                                                                                 | Nrf2-human    | 0.83                | 581            | 593          | -      | 0.877             | 0.75            | ttgGGGCtccccg                          |
| V\$NFKB/V\$NFKAPPAB50.01                                                                                 | Nrf2-human    | 0.83                | 637            | 649          | +      | 0.846             | 1               | gccGGGActccccg                         |
| V\$NFKB/V\$NFKAPPAB50.01                                                                                 | Nrf2-human    | 0.83                | 639            | 651          | -      | 0.855             | 1               | gacGGGAgctccccg                        |

| Family/Matrix                                                                                                                              | Sequence Name | Optimized Threshold | Start Position | End Position | Strand | Matrix Similarity | Core Similarity | Sequence (Core Sequence in Upper Case) |
|--------------------------------------------------------------------------------------------------------------------------------------------|---------------|---------------------|----------------|--------------|--------|-------------------|-----------------|----------------------------------------|
| <b>Nuclear respiratory factor 1 (NRF1), bZIP transcription factor that acts on nuclear genes encoding mitochondrial proteins- in human</b> |               |                     |                |              |        |                   |                 |                                        |
| V\$NRF1/V\$NRF1.01                                                                                                                         | Ap1-human     | 0.78                | 291            | 307          | -      | 0.788             | 0.75            | cggTCGCgggcgctct                       |
| V\$NRF1/V\$NRF1.01                                                                                                                         | Ap1-human     | 0.78                | 292            | 308          | +      | 0.783             | 1               | gagGCGCcccgaccgc                       |
| V\$NRF1/V\$NRF1.01                                                                                                                         | Nrf2-human    | 0.78                | 183            | 199          | -      | 0.781             | 1               | gcaGCGCtctcgccgc                       |
| V\$NRF1/V\$NRF1.01                                                                                                                         | Nrf2-human    | 0.78                | 328            | 344          | -      | 0.826             | 1               | cccGCGCcggggctgac                      |
| <b>Nuclear respiratory factor 1 (NRF1), bZIP transcription factor that acts on nuclear genes encoding mitochondrial proteins-in mouse</b>  |               |                     |                |              |        |                   |                 |                                        |
| V\$NRF1/V\$NRF1.01                                                                                                                         | Ap1-mouse     | 0.78                | 542            | 558          | -      | 0.835             | 1               | cccGCGCccgccccgc                       |
| V\$NRF1/V\$NRF1.01                                                                                                                         | Nrf2-mouse    | 0.78                | 51             | 67           | -      | 0.794             | 0.75            | ccgGCCCGtgctgct                        |
| V\$NRF1/V\$NRF1.01                                                                                                                         | Ap1-mouse     | 0.78                | 543            | 559          | +      | 0.788             | 0.75            | cggGGGCgggcgcgggg                      |
| V\$NRF1/V\$NRF1.01                                                                                                                         | Nrf2-mouse    | 0.78                | 52             | 68           | +      | 0.823             | 1               | gcaGCGCacgggcccggg                     |
| V\$NRF1/V\$NRF1.01                                                                                                                         | Ap1-mouse     | 0.78                | 397            | 413          | +      | 0.784             | 1               | ggcGCGCagccccgcc                       |
| <b>Tumor suppressor p53 (3' half site)</b>                                                                                                 |               |                     |                |              |        |                   |                 |                                        |
| V\$P53F/V\$P53.03                                                                                                                          | Ap1-human     | 0.92                | 514            | 536          | +      | 0.921             | 0.828           | cggcgaaggcagcggCAGGtcgg                |
| V\$P53F/V\$P53.05                                                                                                                          | Nrf2-human    | 0.78                | 399            | 421          | -      | 0.799             | 1               | ccaCAAGggcggggcaagagtc                 |
| <b>B-cell-specific activator protein - in human</b>                                                                                        |               |                     |                |              |        |                   |                 |                                        |
| V\$PAX5/V\$PAX5.01                                                                                                                         | Ap1-human     | 0.79                | 41             | 69           | -      | 0.796             | 0.905           | tctcgcAGCActgatgagtgatcagctct          |
| V\$PAX5/V\$PAX5.01                                                                                                                         | Nrf2-human    | 0.79                | 55             | 83           | +      | 0.798             | 0.81            | ctccaaATCAGggaggcgagctctaca            |
| <b>B-cell-specific activator protein - in mouse</b>                                                                                        |               |                     |                |              |        |                   |                 |                                        |
| V\$PAX5/V\$PAX5.02                                                                                                                         | Ap1-human     | 0.73                | 413            | 441          | -      | 0.731             | 0.842           | ggaccgggcatggGGCGgggcctcgcgc           |
| V\$PAX5/V\$PAX5.02                                                                                                                         | Nrf2-human    | 0.73                | 419            | 447          | +      | 0.734             | 1               | ggggcgggagcggAGCGgggcaggggcc           |
| <b>Zebrafish PAX9 binding sites</b>                                                                                                        |               |                     |                |              |        |                   |                 |                                        |
| V\$PAX9/V\$PAX9.01                                                                                                                         | Ap1-human     | 0.78                | 43             | 63           | -      | 0.833             | 0.824           | agCACTgatgagtgatcagct                  |
| V\$PAX9/V\$PAX9.01                                                                                                                         | Nrf2-human    | 0.78                | 232            | 252          | +      | 0.825             | 1               | ggCACCGggggagctaaccgag                 |
| <b>Binding site for a Pbx1/Meis1 heterodimer</b>                                                                                           |               |                     |                |              |        |                   |                 |                                        |
| V\$PBXC/V\$PBX1_MEIS1.02                                                                                                                   | Ap1-human     | 0.77                | 457            | 473          | +      | 0.772             | 0.75            | ctggTGTTgaccgcga                       |
| V\$PBXC/V\$PBX1_MEIS1.02                                                                                                                   | Nrf2-human    | 0.77                | 611            | 627          | +      | 0.779             | 1               | atcaTGATggacttgga                      |
| <b>Pleomorphic adenoma gene (PLAG) 1, a developmentally regulated C2H2 zinc finger protein</b>                                             |               |                     |                |              |        |                   |                 |                                        |
| V\$PLAG/V\$PLAG1.01                                                                                                                        | Nrf2-mouse    | 0.88                | 268            | 288          | +      | 0.893             | 1               | GAGGatcaacagtggggggtc                  |
| V\$PLAG/V\$PLAG1.01                                                                                                                        | Nrf2-mouse    | 0.88                | 655            | 675          | -      | 0.886             | 1               | GAGGcggcggaatggctagt                   |
| V\$PLAG/V\$PLAG1.01                                                                                                                        | Nrf2-mouse    | 0.88                | 461            | 481          | -      | 0.932             | 1               | GAGGcgggtaagggcgggg                    |
| V\$PLAG/V\$PLAG1.01                                                                                                                        | Nrf2-mouse    | 0.88                | 374            | 394          | -      | 0.939             | 0.958           | GGGGcaaggggagggggggac                  |
| V\$PLAG/V\$PLAG1.01                                                                                                                        | Ap1-mouse     | 0.88                | 566            | 586          | +      | 0.889             | 0.958           | GGGGcaggcaggtgggtcggc                  |
| V\$PLAG/V\$PLAG1.01                                                                                                                        | Nrf2-mouse    | 0.88                | 782            | 802          | -      | 0.881             | 0.958           | GGGGcccgaagttggggcag                   |
| V\$PLAG/V\$PLAG1.01                                                                                                                        | Ap1-mouse     | 0.88                | 406            | 426          | -      | 0.912             | 0.958           | GGGGccgacgacggggcgggg                  |
| V\$PLAG/V\$PLAG1.01                                                                                                                        | Nrf2-mouse    | 0.88                | 360            | 380          | -      | 0.926             | 0.958           | GGGGgacaagacggggcgccag                 |
| V\$PLAG/V\$PLAG1.01                                                                                                                        | Nrf2-mouse    | 0.88                | 578            | 598          | +      | 0.892             | 0.958           | GGGGgcgggggcgggcgggac                  |
| <b>Alpha (1)-fetoprotein transcription factor (FTF), liver receptor homologue-1 (LRH-1)</b>                                                |               |                     |                |              |        |                   |                 |                                        |
| V\$SF1F/V\$FTF.01                                                                                                                          | Ap1-mouse     | 0.94                | 71             | 83           | -      | 0.974             | 1               | cctcCAAGgtgcc                          |
| V\$SF1F/V\$FTF.01                                                                                                                          | Nrf2-mouse    | 0.94                | 6              | 18           | +      | 0.945             | 1               | cgggCAAGgttct                          |

| Family/Matrix                                                                                            | Sequence Name | Optimized Threshold | Start Position | End Position | Strand | Matrix Similarity | Core Similarity | Sequence (Core Sequence in Upper Case) |
|----------------------------------------------------------------------------------------------------------|---------------|---------------------|----------------|--------------|--------|-------------------|-----------------|----------------------------------------|
| <b>GC box elements</b>                                                                                   |               |                     |                |              |        |                   |                 |                                        |
| V\$SP1F/V\$GC.01                                                                                         | Ap1-human     | 0.88                | 418            | 432          | -      | 0.981             | 1               | gatggGGCGgggcct                        |
| V\$SP1F/V\$GC.01                                                                                         | Ap1-human     | 0.88                | 572            | 586          | +      | 0.9               | 1               | gtggcGGCGggggccg                       |
| V\$SP1F/V\$GC.01                                                                                         | Nrf2-human    | 0.88                | 423            | 437          | +      | 0.89              | 1               | cggaGGCGgagcgg                         |
| <b>Stimulating protein 1, ubiquitous zinc finger transcription factor</b>                                |               |                     |                |              |        |                   |                 |                                        |
| V\$SP1F/V\$SP1.01                                                                                        | Nrf2-mouse    | 0.88                | 427            | 441          | -      | 0.904             | 1               | acagGGCagggcaa                         |
| V\$SP1F/V\$SP1.01                                                                                        | Nrf2-mouse    | 0.88                | 470            | 484          | -      | 0.884             | 0.772           | atggAGGCggggtaa                        |
| V\$SP1F/V\$SP1.01                                                                                        | Nrf2-mouse    | 0.88                | 576            | 590          | +      | 0.997             | 1               | caggGGCGggggcg                         |
| V\$SP1F/V\$SP1.01                                                                                        | Nrf2-mouse    | 0.88                | 564            | 578          | -      | 0.912             | 1               | ctggGGCGgaacaa                         |
| V\$SP1F/V\$SP1.01                                                                                        | Ap1-mouse     | 0.88                | 403            | 417          | -      | 1                 | 1               | gacgGGCGggggctg                        |
| V\$SP1F/V\$SP1.01                                                                                        | Ap1-mouse     | 0.88                | 542            | 556          | +      | 0.977             | 1               | gcggGGCGgggcgcg                        |
| V\$SP1F/V\$SP1.01                                                                                        | Nrf2-mouse    | 0.88                | 582            | 596          | +      | 1                 | 1               | gcggGGCGggggcgg                        |
| V\$SP1F/V\$SP1.01                                                                                        | Ap1-mouse     | 0.88                | 563            | 577          | +      | 0.891             | 1               | ggcgGGCaggcagg                         |
| V\$SP1F/V\$SP1.01                                                                                        | Nrf2-mouse    | 0.88                | 587            | 601          | +      | 0.913             | 1               | ggcgGGCGgactaa                         |
| V\$SP1F/V\$SP1.01                                                                                        | Ap1-mouse     | 0.88                | 584            | 598          | +      | 0.977             | 1               | ggcgGGCGgggcgga                        |
| V\$SP1F/V\$SP1.01                                                                                        | Nrf2-mouse    | 0.88                | 458            | 472          | -      | 0.989             | 1               | taagGGCGggggcaa                        |
| V\$SP1F/V\$SP1.02                                                                                        | Nrf2-mouse    | 0.85                | 58             | 72           | +      | 0.852             | 0.75            | cacgGGCCggggctc                        |
| V\$SP1F/V\$SP1.02                                                                                        | Nrf2-mouse    | 0.85                | 207            | 221          | -      | 0.959             | 1               | cgggGGCGgagcgc                         |
| V\$SP1F/V\$SP1.02                                                                                        | Ap1-mouse     | 0.85                | 432            | 446          | +      | 0.916             | 1               | ggtgGGCGggtgtct                        |
| <b>Serum response factor</b>                                                                             |               |                     |                |              |        |                   |                 |                                        |
| V\$SRFF/V\$SRF.02                                                                                        | Nrf2-mouse    | 0.84                | 21             | 39           | +      | 0.857             | 0.889           | aggtcCAAAtcagggagt                     |
| V\$SRFF/V\$SRF.02                                                                                        | Ap1-mouse     | 0.84                | 103            | 121          | -      | 0.851             | 1               | tagagCATAcatggacca                     |
| <b>ZNF143 (the human ortholog of Xenopus Staf, and a DNA binding protein related to ZNF143 and Staf)</b> |               |                     |                |              |        |                   |                 |                                        |
| V\$STAF/V\$ZNF76_143.01                                                                                  | Ap1-human     | 0.76                | 305            | 327          | +      | 0.793             | 1               | ccgcCCCcagcccagagcta                   |
| V\$STAF/V\$ZNF76_143.01                                                                                  | Nrf2-human    | 0.76                | 366            | 388          | -      | 0.825             | 0.81            | cttcCCCgcccgcgcccggc                   |
| V\$STAF/V\$ZNF76_143.01                                                                                  | Nrf2-human    | 0.76                | 667            | 689          | +      | 0.796             | 0.81            | tcggCCCTctggccctgcggtg                 |
| <b>Signal transducers and activators of transcription</b>                                                |               |                     |                |              |        |                   |                 |                                        |
| V\$STAT/V\$STAT.01                                                                                       | Ap1-human     | 0.87                | 174            | 192          | -      | 0.908             | 1               | gcggttagtGAAagagta                     |
| V\$STAT/V\$STAT.01                                                                                       | Nrf2-human    | 0.87                | 348            | 366          | +      | 0.887             | 1               | gggattttcGGAagctcag                    |
| <b>Core promoter-binding protein (CPBP) with 3 Krueppel-type zinc fingers - in human</b>                 |               |                     |                |              |        |                   |                 |                                        |
| V\$ZBPF/V\$ZF9.01                                                                                        | Ap1-human     | 0.87                | 298            | 320          | +      | 0.882             | 1               | cccgcgaCCGCcccaccagccc                 |
| V\$ZBPF/V\$ZF9.01                                                                                        | Ap1-human     | 0.87                | 414            | 436          | +      | 0.879             | 0.821           | cgcgaggCCCGcccctcgcggc                 |
| V\$ZBPF/V\$ZF9.01                                                                                        | Ap1-human     | 0.87                | 416            | 438          | +      | 0.942             | 1               | cgaggccCCGCcccctcgcggc                 |
| V\$ZBPF/V\$ZF9.01                                                                                        | Nrf2-human    | 0.87                | 542            | 564          | +      | 0.884             | 1               | gtccgcgCCGCgcctcgcgagcc                |
| <b>Core promoter-binding protein (CPBP) with 3 Krueppel-type zinc fingers - in mouse</b>                 |               |                     |                |              |        |                   |                 |                                        |
| V\$ZBPF/V\$ZF9.01                                                                                        | Ap1-mouse     | 0.87                | 578            | 600          | -      | 0.885             | 1               | actccgcCCGCcccgcgaccga                 |
| V\$ZBPF/V\$ZF9.01                                                                                        | Ap1-mouse     | 0.87                | 536            | 558          | -      | 0.957             | 1               | cccgcgcCCGCcccgcgccc                   |
| V\$ZBPF/V\$ZF9.01                                                                                        | Ap1-mouse     | 0.87                | 542            | 564          | -      | 0.937             | 1               | ccgggcccCGCcccgcggc                    |
| V\$ZBPF/V\$ZF9.01                                                                                        | Ap1-mouse     | 0.87                | 401            | 423          | +      | 0.915             | 1               | ctcagccCCGCccgtcgtcggc                 |
| V\$ZBPF/V\$ZF9.01                                                                                        | Ap1-mouse     | 0.87                | 479            | 501          | -      | 0.87              | 1               | ctcggggCCGCcgcgcgcccagc                |
| V\$ZBPF/V\$ZF9.01                                                                                        | Ap1-mouse     | 0.87                | 426            | 448          | -      | 0.903             | 1               | gcagacaCCGCcccaccaagtcg                |
| V\$ZBPF/V\$ZF9.01                                                                                        | Ap1-mouse     | 0.87                | 473            | 495          | -      | 0.879             | 1               | gcccgcgCCGCgcccagcagctgt               |
| V\$ZBPF/V\$ZF9.01                                                                                        | Nrf2-mouse    | 0.87                | 456            | 478          | +      | 0.917             | 1               | tcttccCCGCccctaccgcc                   |

| Family/Matrix                                          | Sequence Name | Optimized Threshold | Start Position | End Position | Strand | Matrix Similarity | Core Similarity | Sequence (Core Sequence in Upper Case) |
|--------------------------------------------------------|---------------|---------------------|----------------|--------------|--------|-------------------|-----------------|----------------------------------------|
| <b>Kruppel-like zinc finger protein 219 - in human</b> |               |                     |                |              |        |                   |                 |                                        |
| V\$ZBPF/V\$ZNF219.01                                   | Ap1-human     | 0.91                | 387            | 409          | -      | 0.988             | 1               | cgtgactCCCCcggccctcgggg                |
| V\$ZBPF/V\$ZNF219.01                                   | Nrf2-human    | 0.91                | 298            | 320          | +      | 0.95              | 1               | cttcccgCCCCcggaccgcgagc                |
| V\$ZBPF/V\$ZNF219.01                                   | Nrf2-human    | 0.91                | 689            | 711          | -      | 0.987             | 1               | tccccgCCCCcgtcccggcacc                 |
| <b>Kruppel-like zinc finger protein 219 - in mouse</b> |               |                     |                |              |        |                   |                 |                                        |
| V\$ZBPF/V\$ZNF219.01                                   | Nrf2-mouse    | 0.91                | 573            | 595          | -      | 0.996             | 1               | cgccccgCCCCcgccccctgggg                |
| V\$ZBPF/V\$ZNF219.01                                   | Nrf2-mouse    | 0.91                | 208            | 230          | +      | 0.918             | 1               | cgctccgCCCCccgtgcgacttc                |
| V\$ZBPF/V\$ZNF219.01                                   | Nrf2-mouse    | 0.91                | 371            | 393          | +      | 0.993             | 1               | cttgtccCCCCctccccttgccc                |
| V\$ZBPF/V\$ZNF219.01                                   | Ap1-mouse     | 0.91                | 533            | 555          | -      | 0.973             | 1               | gcgcccgCCCCcgccgcgccgct                |
| V\$ZBPF/V\$ZNF219.01                                   | Nrf2-mouse    | 0.91                | 172            | 194          | -      | 0.943             | 1               | ttcggccCCCCcagtctctgta                 |
| <b>Human zinc finger protein ZNF35</b>                 |               |                     |                |              |        |                   |                 |                                        |
| V\$ZF35/V\$ZNF35.01                                    | Ap1-mouse     | 0.96                | 497            | 509          | +      | 0.967             | 1               | ccgagcAAGAtgg                          |
| V\$ZF35/V\$ZNF35.01                                    | Nrf2-mouse    | 0.96                | 453            | 465          | -      | 0.964             | 1               | cggggcAAGAgct                          |
